# Supplementary material for: Consultation patterns and frequent attenders in UK primary care from 2000 to 2019: a retrospective cohort analysis of consultation events across 845 general practices
Source: HighWire-hosted journal article supplement (doi:10.1136/bmjopen-2021-054666), 2021-12-01
Supplement: bmjopen-2021-054666supp001_data_supplement.pdf [file bmjopen-2021-054666supp001_data_supplement.pdf]

## Supplementary file to “Consultation patterns and frequent attenders in UK primary care from 2000 to 2019: a retrospective cohort analysis of consultation events across 845 general practices”

### Defining the consultation groups

GPs defined as: 1,2,3,4,5,6,7,8,9,10,47,50 in Table 1 (in red font).

**Table 1: Staff Role**

| <b>Code</b> | <b>Description</b>                            |
|-------------|-----------------------------------------------|
| 0           | Data Not Entered                              |
| 1           | Senior Partner                                |
| 2           | Partner                                       |
| 3           | Assistant                                     |
| 4           | Associate                                     |
| 5           | Non-commercial local rota of less than 10 GPs |
| 6           | Commercial Deputising service                 |
| 7           | Locum                                         |
| 8           | GP Registrar                                  |
| 9           | Consultant                                    |
| 10          | Sole Practitioner                             |
| 11          | Practice Nurse                                |
| 12          | Health Visitor                                |
| 13          | Community Nurse                               |
| 14          | Midwife                                       |
| 15          | Community Psychiatric Nurse                   |
| 16          | Social Worker                                 |
| 17          | Pharmacist                                    |
| 18          | Dispenser                                     |
| 19          | Non-qualified Dispenser                       |
| 20          | Practice Manager                              |
| 21          | Fund Manager                                  |
| 22          | Business Manager                              |
| 23          | Administrator                                 |
| 24          | Secretary                                     |
| 25          | Receptionist                                  |
| 26          | Physiotherapist                               |
| 27          | Chiropodist                                   |
| 28          | Dentist                                       |
| 29          | Dietician                                     |
| 30          | Counsellor                                    |
| 31          | Osteopath                                     |
| 32          | Maintenance staff                             |
| 33          | Other Health Care Professional                |
| 34          | Hospital Nurse                                |
| 35          | Community Medical Officer                     |
| 36          | School Nurse                                  |

| Code | Description                               |
|------|-------------------------------------------|
| 37   | Health Education Officer                  |
| 38   | Contact Tracing Nurse                     |
| 39   | Stomatherapist                            |
| 40   | Computer Manager                          |
| 41   | Interpreter/Link Worker                   |
| 42   | Chiropractor                              |
| 43   | Acupuncturist                             |
| 44   | Homeopath                                 |
| 45   | Mental Handicap Nurse                     |
| 46   | Carer                                     |
| 47   | Salaried Partner                          |
| 48   | Occupational Therapist                    |
| 49   | Speech Therapist                          |
| 50   | GP Retainer                               |
| 51   | Phlebotomist                              |
| 52   | Other Medical & Dental                    |
| 53   | Other Students                            |
| 54   | Other Nursing & Midwifery                 |
| 55   | Other Allied Health Professionals         |
| 56   | Other Professional Scientific & Technical |
| 57   | Other Healthcare Scientists               |
| 58   | Other Additional Clinical Services        |
| 59   | Other Admin & Clerical                    |
| 60   | Clinical Practitioner Access Role         |
| 61   | Nurse Access Role                         |
| 62   | Nurse Manager Access Role                 |
| 63   | Health Professional Access Role           |
| 64   | Healthcare Student Access Role            |
| 65   | Biomedical Scientist Access Role          |
| 66   | Clinical Coder Access Role                |
| 67   | Optometrist                               |
| 68   | Radiographer                              |

Face-to-face consultations defined as 1,2,3,4,6,7,8,9,11,18,24,27,28,30,31,32,33,34,36,37,38,50,61 in Table 2 (in red font).

**Table 2: Consultation type**

| Code | Description                     |
|------|---------------------------------|
| 0    | Data Not Entered                |
| 1    | Clinic                          |
| 2    | Night visit, Deputising service |
| 3    | Follow-up/routine visit         |
| 4    | Night visit, Local rota         |
| 5    | Mail from patient               |
| 6    | Night visit , practice          |
| 7    | Out of hours, Practice          |
| 8    | Out of hours, Non Practice      |

| <b>Code</b> | <b>Description</b>                 |
|-------------|------------------------------------|
| 9           | Surgery consultation               |
| 10          | Telephone call from a patient      |
| 11          | Acute visit                        |
| 12          | Discharge details                  |
| 13          | Letter from Outpatients            |
| 14          | Repeat Issue                       |
| 15          | Other                              |
| 16          | Results recording                  |
| 17          | Mail to patient                    |
| 18          | Emergency Consultation             |
| 19          | Administration                     |
| 20          | Casualty Attendance                |
| 21          | Telephone call to a patient        |
| 22          | Third Party Consultation           |
| 23          | Hospital Admission                 |
| 24          | Children's Home Visit              |
| 25          | Day Case Report                    |
| 26          | GOS18 Report                       |
| 27          | Home Visit                         |
| 28          | Hotel Visit                        |
| 29          | NHS Direct Report                  |
| 30          | Nursing Home Visit                 |
| 31          | Residential Home Visit             |
| 32          | Twilight Visit                     |
| 33          | Triage                             |
| 34          | Walk-in Centre                     |
| 35          | Co-op Telephone advice             |
| 36          | Co-op Surgery Consultation         |
| 37          | Co-op Home Visit                   |
| 38          | Minor Injury Service               |
| 39          | Medicine Management                |
| 40          | Community Clinic                   |
| 41          | Community Nursing Note             |
| 42          | Community Nursing Report           |
| 43          | Data Transferred from other system |
| 44          | Health Authority Entry             |
| 45          | Health Visitor Note                |
| 46          | Health Visitor Report              |
| 47          | Hospital Inpatient Report          |
| 48          | Initial Post Discharge Review      |
| 49          | Laboratory Request                 |
| 50          | Night Visit                        |
| 51          | Radiology Request                  |
| 52          | Radiology Result                   |
| 53          | Referral Letter                    |
| 54          | Social Services Report             |
| 55          | Telephone Consultation             |

| <b>Code</b> | <b>Description</b>                 |
|-------------|------------------------------------|
| 56          | Template Entry                     |
| 57          | GP to GP communication transaction |
| 58          | Non-consultation medication data   |
| 59          | Non-consultation data              |
| 60          | ePharmacy message                  |
| 61          | Extended Hours                     |

Median (50<sup>th</sup> centile)**Table 3 Medians (25<sup>th</sup> – 75<sup>th</sup> centiles) of median number of consultations by consultation type, all practices**

| Year      | All consultations by all staff | All consultations by GPs | Face-to-face consultations by all staff | Face-to-face consultations by GPs |
|-----------|--------------------------------|--------------------------|-----------------------------------------|-----------------------------------|
| 2000-2001 | 7 (6-8)                        | 3 (3-4)                  | 4 (3-4)                                 | 2 (2-3)                           |
| 2001-2002 | 8 (7-9)                        | 3 (3-4)                  | 4 (3-4)                                 | 2 (2-3)                           |
| 2002-2003 | 9 (7-10)                       | 3 (3-4)                  | 3 (3-4)                                 | 2 (2-3)                           |
| 2003-2004 | 9 (7-11)                       | 3 (3-4)                  | 3 (3-4)                                 | 2 (2-3)                           |
| 2004-2005 | 9 (7-11)                       | 3 (3-4)                  | 3 (3-4)                                 | 2 (2-3)                           |
| 2005-2006 | 10 (8-13)                      | 4 (3-4)                  | 4 (3-4)                                 | 2 (2-3)                           |
| 2006-2007 | 10 (8-13)                      | 4 (3-4)                  | 3 (3-4)                                 | 2 (2-3)                           |
| 2007-2008 | 11 (9-13)                      | 4 (3-5)                  | 3 (3-4)                                 | 2 (2-3)                           |
| 2008-2009 | 12 (10-14)                     | 4 (3-5)                  | 3 (3-4)                                 | 2 (2-3)                           |
| 2009-2010 | 13 (11-15)                     | 4 (3-5)                  | 4 (3-4)                                 | 2 (2-3)                           |
| 2010-2011 | 13 (11-15)                     | 4 (3-5)                  | 3 (3-4)                                 | 2 (2-3)                           |
| 2011-2012 | 13 (11-15)                     | 4 (4-5)                  | 3 (3-4)                                 | 2 (2-3)                           |
| 2012-2013 | 14 (12-16)                     | 4 (4-5)                  | 4 (3-4)                                 | 2 (2-3)                           |
| 2013-2014 | 14 (12-17)                     | 5 (4-5)                  | 4 (3-4)                                 | 2 (2-3)                           |
| 2014-2015 | 14 (12-17)                     | 5 (4-6)                  | 3 (3-4)                                 | 2 (2-3)                           |
| 2015-2016 | 14 (12-17)                     | 4 (3-5)                  | 3 (3-4)                                 | 2 (1-2)                           |
| 2016-2017 | 15 (12-17)                     | 5 (4-6)                  | 3 (3-4)                                 | 2 (1-2)                           |
| 2017-2018 | 15 (13-18)                     | 5 (4-6)                  | 3 (3-4)                                 | 2 (1-2)                           |
| 2018-2019 | 16 (13-18)                     | 5 (4-6)                  | 3 (2-4)                                 | 2 (1-2)                           |

**Table 4 Medians (25<sup>th</sup> – 75<sup>th</sup> centiles) of proportion of high volume ( $\geq$  50<sup>th</sup> centile) by consultation type, all practices**

| Year      | All consultations by all staff |                          | Face-to-face consultations | Face-to-face consultations |
|-----------|--------------------------------|--------------------------|----------------------------|----------------------------|
|           |                                | All consultations by GPs | by all staff               | by GPs                     |
| 2000-2001 | 87.0 (86.2-87.8)               | 90.2 (88.2-92.4)         | 87.9 (86.0-90.1)           | 91.6 (87.9-94.0)           |
| 2001-2002 | 87.3 (86.4-88.1)               | 90.3 (88.4-92.5)         | 88.4 (86.8-90.4)           | 92.2 (88.7-94.0)           |
| 2002-2003 | 87.4 (86.6-88.2)               | 90.8 (89.1-93.0)         | 88.8 (87.2-90.5)           | 92.7 (89.2-94.2)           |
| 2003-2004 | 87.6 (86.9-88.4)               | 90.9 (89.3-92.8)         | 89.1 (87.5-90.8)           | 92.7 (89.6-94.1)           |
| 2004-2005 | 88.3 (87.5-89.1)               | 91.8 (89.7-93.9)         | 90.2 (88.4-92.6)           | 93.3 (90.5-94.9)           |
| 2005-2006 | 88.0 (87.2-88.8)               | 91.5 (89.7-93.2)         | 89.5 (87.8-91.5)           | 92.9 (90.3-94.4)           |
| 2006-2007 | 88.4 (87.5-89.3)               | 92.1 (90.1-94.1)         | 90.7 (88.5-92.7)           | 93.4 (91.0-95.2)           |
| 2007-2008 | 88.1 (87.2-88.9)               | 91.5 (89.9-93.0)         | 89.7 (87.9-91.7)           | 93.0 (90.7-94.5)           |
| 2008-2009 | 88.1 (87.3-88.8)               | 91.5 (90.0-93.0)         | 90.0 (88.3-91.9)           | 93.4 (91.2-94.8)           |
| 2009-2010 | 87.9 (87.2-88.7)               | 91.3 (90.0-93.0)         | 89.8 (88.2-91.9)           | 93.2 (90.8-94.7)           |
| 2010-2011 | 88.0 (87.3-88.8)               | 91.4 (90.0-93.0)         | 90.0 (88.3-92.0)           | 93.3 (91.2-94.8)           |
| 2011-2012 | 88.1 (87.4-88.8)               | 91.4 (90.1-92.6)         | 90.2 (88.6-92.0)           | 93.3 (91.4-95.0)           |
| 2012-2013 | 88.1 (87.4-88.9)               | 91.4 (90.1-92.6)         | 90.0 (88.5-92.0)           | 93.4 (91.1-94.9)           |
| 2013-2014 | 88.1 (87.3-88.8)               | 91.5 (90.4-92.7)         | 90.3 (88.8-92.0)           | 93.5 (91.7-95.2)           |
| 2014-2015 | 88.3 (87.4-88.9)               | 91.6 (90.4-93.0)         | 90.9 (89.3-92.5)           | 93.7 (91.8-95.3)           |
| 2015-2016 | 87.7 (86.8-88.7)               | 92.2 (90.7-94.2)         | 92.0 (90.1-94.1)           | 94.7 (92.9-100)            |
| 2016-2017 | 88.2 (87.4-88.9)               | 91.8 (90.6-93.3)         | 91.7 (89.8-93.4)           | 94.4 (92.3-96.5)           |
| 2017-2018 | 88.2 (87.3-88.9)               | 91.7 (90.4-93.1)         | 91.6 (89.7-93.4)           | 94.4 (92.4-100)            |
| 2018-2019 | 88.2 (87.3-88.9)               | 91.9 (90.6-92.9)         | 91.8 (89.9-93.9)           | 94.5 (92.6-100)            |

**Table 5: Medians (25<sup>th</sup> – 75<sup>th</sup> centiles) of ratio for users ≥50<sup>th</sup> centile over the rest of consultations by consultation type, all practices**

| Year      | All consultations by all staff |                          | Face-to-face consultations by all staff |                                   |
|-----------|--------------------------------|--------------------------|-----------------------------------------|-----------------------------------|
|           |                                | All consultations by GPs |                                         | Face-to-face consultations by GPs |
| 2000-2001 | 6.1 (5.7-6.4)                  | 7.5 (6.5-8.9)            | 6.0 (5.5-6.7)                           | 7.7 (6.3-9.5)                     |
| 2001-2002 | 6.3 (5.9-6.7)                  | 7.7 (6.6-9.1)            | 6.4 (5.8-7.1)                           | 8.2 (6.6-9.6)                     |
| 2002-2003 | 6.5 (6.0-6.9)                  | 8.0 (6.9-9.7)            | 6.5 (6.0-7.4)                           | 8.5 (6.8-9.8)                     |
| 2003-2004 | 6.6 (6.2-7.1)                  | 8.4 (7.3-10.1)           | 6.7 (6.2-7.6)                           | 8.7 (7.2-10.1)                    |
| 2004-2005 | 7.0 (6.6-7.6)                  | 9.2 (7.6-12.0)           | 7.5 (6.6-9.7)                           | 9.4 (7.7-11.4)                    |
| 2005-2006 | 6.9 (6.5-7.4)                  | 9.0 (7.8-10.7)           | 7.1 (6.4-8.2)                           | 9.2 (7.6-10.6)                    |
| 2006-2007 | 7.2 (6.6-7.8)                  | 9.9 (8.0-12.6)           | 7.8 (6.8-10)                            | 9.9 (8.0-12.1)                    |
| 2007-2008 | 7.0 (6.6-7.5)                  | 9.2 (7.9-10.8)           | 7.2 (6.5-8.5)                           | 9.2 (7.7-10.7)                    |
| 2008-2009 | 7.0 (6.6-7.5)                  | 9.2 (8.1-11.0)           | 7.4 (6.6-8.6)                           | 9.7 (8.2-11.4)                    |
| 2009-2010 | 6.9 (6.5-7.4)                  | 9.3 (8.0-11.0)           | 7.4 (6.6-8.6)                           | 9.8 (8.0-11.2)                    |
| 2010-2011 | 7.0 (6.6-7.5)                  | 9.3 (8.0-11.0)           | 7.5 (6.6-8.6)                           | 9.9 (8.3-11.4)                    |
| 2011-2012 | 7.1 (6.6-7.6)                  | 9.3 (8.1-10.7)           | 7.5 (6.8-8.7)                           | 10.0 (8.4-11.4)                   |
| 2012-2013 | 7.1 (6.7-7.6)                  | 9.3 (8.2-10.6)           | 7.6 (6.8-8.8)                           | 9.8 (8.3-11.4)                    |
| 2013-2014 | 7.1 (6.6-7.6)                  | 9.6 (8.5-11.0)           | 7.7 (7.0-8.9)                           | 10.2 (8.7-11.9)                   |
| 2014-2015 | 7.2 (6.7-7.7)                  | 9.7 (8.6-11.3)           | 8.2 (7.3-9.5)                           | 10.5 (8.9-12.1)                   |
| 2015-2016 | 6.9 (6.4-7.5)                  | 10.4 (8.6-14.4)          | 9.5 (7.7-11.9)                          | 11.4 (9.6-14.2)                   |
| 2016-2017 | 7.2 (6.6-7.7)                  | 9.8 (8.7-12.1)           | 8.7 (7.6-10.5)                          | 11.0 (9.3-13.0)                   |
| 2017-2018 | 7.1 (6.6-7.7)                  | 9.9 (8.7-11.8)           | 8.6 (7.6-10.8)                          | 11.1 (9.2-12.9)                   |
| 2018-2019 | 7.2 (6.6-7.8)                  | 9.9 (8.8-11.8)           | 8.9 (7.8-11.2)                          | 11.2 (9.6-13.3)                   |

75<sup>th</sup> centile**Table 6 Medians (25<sup>th</sup> – 75<sup>th</sup> centiles) of 75<sup>th</sup> centile number of consultations by consultation type, all practices**

| Year      | All consultations by all staff | All consultations by GPs | Face-to-face consultations by all staff | Face-to-face consultations by GPs |
|-----------|--------------------------------|--------------------------|-----------------------------------------|-----------------------------------|
| 2000-2001 | 16 (14-18)                     | 7 (6-10)                 | 7 (6-9)                                 | 5 (4-6)                           |
| 2001-2002 | 17.5 (15-20)                   | 7 (6-9)                  | 7 (6-9)                                 | 5 (4-6)                           |
| 2002-2003 | 19 (16-22)                     | 7 (6-9)                  | 7 (6-9)                                 | 5 (4-6)                           |
| 2003-2004 | 21 (17-24)                     | 8 (6-10)                 | 7 (6-9)                                 | 5 (4-6)                           |
| 2004-2005 | 22 (18-26)                     | 8 (7-10)                 | 7 (6-9)                                 | 5 (4-6)                           |
| 2005-2006 | 24 (19-28)                     | 9 (7-11)                 | 7 (6-10)                                | 5 (4-6)                           |
| 2006-2007 | 24 (20-29)                     | 9 (7-11)                 | 7 (6-9)                                 | 4 (4-6)                           |
| 2007-2008 | 26 (21-30)                     | 9 (7-11)                 | 7 (6-9)                                 | 5 (4-6)                           |
| 2008-2009 | 27 (23-31.5)                   | 9 (8-11)                 | 7 (6-9)                                 | 5 (4-6)                           |
| 2009-2010 | 28 (24-33)                     | 10 (8-12)                | 7 (6-9)                                 | 5 (4-6)                           |
| 2010-2011 | 28 (24-33)                     | 10 (8-12)                | 7 (6-9)                                 | 5 (4-6)                           |
| 2011-2012 | 29 (25-34)                     | 10 (9-12)                | 7 (6-9)                                 | 5 (4-6)                           |
| 2012-2013 | 30 (26-35)                     | 10 (9-12)                | 7 (6-9)                                 | 5 (4-6)                           |
| 2013-2014 | 32 (27-37)                     | 11 (9-13)                | 7 (6-9)                                 | 5 (4-6)                           |
| 2014-2015 | 32 (28-37)                     | 11 (10-13)               | 7 (6-9)                                 | 5 (4-6)                           |
| 2015-2016 | 32 (28-37)                     | 11 (9-13)                | 7 (6-8)                                 | 5 (4-5)                           |
| 2016-2017 | 32 (28-38)                     | 11 (9-13)                | 7 (6-8)                                 | 5 (4-6)                           |
| 2017-2018 | 33 (29-38)                     | 11 (9-13)                | 7 (6-8)                                 | 4 (3-5)                           |
| 2018-2019 | 35 (30-40)                     | 11 (10-13)               | 7 (6-8)                                 | 4 (3-5)                           |



**Table 7 Medians (25<sup>th</sup> – 75<sup>th</sup> centiles) of proportion of high volume ( $\geq$  75<sup>th</sup> centile) by consultation type, all practices**

| Year      | All consultations by all staff |                          | Face-to-face consultations | Face-to-face consultations |
|-----------|--------------------------------|--------------------------|----------------------------|----------------------------|
|           |                                | All consultations by GPs | by all staff               | by GPs                     |
| 2000-2001 | 62.4 (61.2-63.9)               | 65.8 (63.5-69.1)         | 63.7 (61.6-66.0)           | 66.4 (63.8-69.9)           |
| 2001-2002 | 62.9 (61.6-64.3)               | 66.5 (64.0-69.1)         | 63.7 (61.8-66.4)           | 66.8 (64.3-70.4)           |
| 2002-2003 | 63.1 (61.9-64.6)               | 67.4 (64.7-69.8)         | 64.4 (62.3-66.7)           | 67.9 (64.3-71.3)           |
| 2003-2004 | 63.5 (62.2-64.8)               | 67.7 (65.4-70.2)         | 64.9 (62.7-67.3)           | 68.2 (65.0-71.8)           |
| 2004-2005 | 64.3 (63.0-65.7)               | 68.9 (66.1-71.7)         | 66.2 (63.9-69.0)           | 69.5 (66.1-73.4)           |
| 2005-2006 | 63.8 (62.6-65.3)               | 68.2 (65.9-70.8)         | 65.4 (63.2-67.7)           | 68.9 (65.7-72.2)           |
| 2006-2007 | 64.6 (63.0-66.0)               | 69.3 (66.3-71.9)         | 66.4 (64.0-69.4)           | 70.3 (66.7-73.9)           |
| 2007-2008 | 64.1 (62.7-65.4)               | 68.4 (66.4-70.7)         | 65.5 (63.2-68.0)           | 69.2 (66.0-72.8)           |
| 2008-2009 | 64.2 (62.7-65.5)               | 68.2 (66.5-70.7)         | 65.8 (63.9-68.6)           | 69.5 (66.4-72.7)           |
| 2009-2010 | 63.8 (62.6-65.2)               | 68.4 (66.2-70.5)         | 65.8 (63.7-68.0)           | 69.5 (66.6-72.4)           |
| 2010-2011 | 64.0 (62.7-65.5)               | 68.3 (66.4-70.4)         | 66.3 (64.2-68.5)           | 69.5 (66.8-72.4)           |
| 2011-2012 | 64.3 (62.9-65.4)               | 68.4 (66.5-70.2)         | 66.2 (64.1-68.8)           | 69.8 (67.0-73.0)           |
| 2012-2013 | 64.3 (62.9-65.6)               | 68.4 (66.8-70.2)         | 66.5 (64.6-68.8)           | 69.6 (67.0-73.1)           |
| 2013-2014 | 64.2 (62.9-65.7)               | 68.7 (66.8-70.5)         | 66.7 (64.6-69.0)           | 70.1 (67.4-73.4)           |
| 2014-2015 | 64.5 (62.9-65.9)               | 69.0 (67.3-70.8)         | 67.3 (65.3-69.4)           | 70.6 (67.9-73.8)           |
| 2015-2016 | 63.7 (62.4-65.5)               | 69.6 (67.4-72.5)         | 68.8 (66.4-71.7)           | 72.3 (69.1-76.8)           |
| 2016-2017 | 64.3 (62.8-65.8)               | 69.2 (67.3-71.2)         | 68.2 (66.0-70.7)           | 71.5 (68.3-75.6)           |
| 2017-2018 | 64.1 (62.7-65.8)               | 69.0 (67.1-71.3)         | 68.4 (65.5-71.4)           | 72.1 (69.0-76.1)           |
| 2018-2019 | 64.2 (62.6-65.5)               | 69.0 (67.3-71.3)         | 68.6 (66.2-71.2)           | 72.6 (69.3-77.2)           |

**Table 8: Medians (25<sup>th</sup> – 75<sup>th</sup> centiles) of ratio for users ≥75<sup>th</sup> centile over the rest of consultations by consultation type, all practices**

| Year      | All consultations by all staff |                          | Face-to-face consultations by all staff | Face-to-face consultations by GPs |
|-----------|--------------------------------|--------------------------|-----------------------------------------|-----------------------------------|
|           |                                | All consultations by GPs |                                         |                                   |
| 2000-2001 | 4.7 (4.5-5.0)                  | 5.1 (4.8-5.7)            | 4.6 (4.4-4.9)                           | 5.0 (4.6-5.5)                     |
| 2001-2002 | 4.8 (4.6-5.1)                  | 5.3 (4.9-5.8)            | 4.7 (4.4-5.0)                           | 5.1 (4.7-5.7)                     |
| 2002-2003 | 4.9 (4.6-5.2)                  | 5.4 (5.0-6.1)            | 4.8 (4.5-5.2)                           | 5.1 (4.8-5.8)                     |
| 2003-2004 | 5.0 (4.7-5.3)                  | 5.7 (5.2-6.3)            | 4.9 (4.6-5.3)                           | 5.3 (4.9-6.0)                     |
| 2004-2005 | 5.2 (4.9-5.5)                  | 6.0 (5.4-6.7)            | 5.2 (4.8-5.8)                           | 5.7 (5.2-6.6)                     |
| 2005-2006 | 5.1 (4.8-5.4)                  | 5.8 (5.4-6.5)            | 5.0 (4.7-5.5)                           | 5.5 (5.0-6.3)                     |
| 2006-2007 | 5.3 (4.9-5.6)                  | 6.2 (5.5-7.0)            | 5.3 (4.9-6.0)                           | 5.9 (5.2-6.8)                     |
| 2007-2008 | 5.2 (4.9-5.5)                  | 5.9 (5.5-6.5)            | 5.1 (4.7-5.5)                           | 5.6 (5.1-6.2)                     |
| 2008-2009 | 5.2 (4.9-5.5)                  | 5.9 (5.5-6.6)            | 5.1 (4.8-5.6)                           | 5.6 (5.2-6.3)                     |
| 2009-2010 | 5.1 (4.9-5.4)                  | 6.0 (5.5-6.5)            | 5.1 (4.8-5.6)                           | 5.6 (5.2-6.3)                     |
| 2010-2011 | 5.2 (4.9-5.5)                  | 6.0 (5.5-6.5)            | 5.2 (4.8-5.6)                           | 5.6 (5.2-6.2)                     |
| 2011-2012 | 5.2 (4.9-5.5)                  | 6.0 (5.6-6.5)            | 5.2 (4.9-5.7)                           | 5.7 (5.3-6.3)                     |
| 2012-2013 | 5.2 (4.9-5.6)                  | 6.0 (5.6-6.5)            | 5.3 (4.9-5.7)                           | 5.8 (5.3-6.4)                     |
| 2013-2014 | 5.2 (5.0-5.6)                  | 6.1 (5.7-6.6)            | 5.3 (5.0-5.8)                           | 5.9 (5.4-6.5)                     |
| 2014-2015 | 5.3 (5.0-5.6)                  | 6.2 (5.8-6.7)            | 5.4 (5.1-6.0)                           | 6.0 (5.5-6.7)                     |
| 2015-2016 | 5.2 (4.8-5.6)                  | 6.4 (5.9-7.3)            | 5.9 (5.3-6.6)                           | 6.6 (5.8-7.7)                     |
| 2016-2017 | 5.3 (4.9-5.6)                  | 6.3 (5.8-6.9)            | 5.7 (5.2-6.3)                           | 6.3 (5.7-7.3)                     |
| 2017-2018 | 5.2 (4.9-5.6)                  | 6.3 (5.7-6.8)            | 5.7 (5.2-6.3)                           | 6.4 (5.8-7.4)                     |
| 2018-2019 | 5.2 (4.9-5.6)                  | 6.3 (5.8-6.9)            | 5.7 (5.3-6.4)                           | 6.5 (5.8-7.7)                     |

## Twelve or more consultations

**Table 9 Medians (25<sup>th</sup> – 75<sup>th</sup> centiles) of proportion of patients with 12 or more consultations by consultation type, all practices**

| Year             | All consultations by all staff | All consultations by GPs | Face-to-face consultations by all staff | Face-to-face consultations by GPs |
|------------------|--------------------------------|--------------------------|-----------------------------------------|-----------------------------------|
| <b>2000-2001</b> | 36.0 (30.5-40.5)               | 12.6 (7.5-20.1)          | 10.6 (7.9-15.6)                         | 4.9 (3.4-9.3)                     |
| <b>2001-2002</b> | 38.9 (32.9-42.8)               | 12.5 (8.1-17.9)          | 11.2 (7.9-16.7)                         | 4.6 (3.0-8.4)                     |
| <b>2002-2003</b> | 40.9 (34.7-45.9)               | 12.7 (7.7-18.2)          | 10.7 (7.5-16.4)                         | 4.3 (2.8-7.7)                     |
| <b>2003-2004</b> | 43.3 (37.2-48.4)               | 14.4 (10.2-19.5)         | 10.8 (7.5-18.1)                         | 4.2 (2.6-7.5)                     |
| <b>2004-2005</b> | 44.3 (37.8-49.5)               | 15.7 (11.6-20.7)         | 11.2 (7.4-18.4)                         | 4.1 (2.5-7.9)                     |
| <b>2005-2006</b> | 47.2 (40.7-52.5)               | 17.0 (13.3-22.7)         | 11.9 (8.1-20.1)                         | 4.3 (2.7-8.0)                     |
| <b>2006-2007</b> | 47.3 (41.0-52.4)               | 17.5 (13.2-22.8)         | 11.6 (7.7-19.5)                         | 4.2 (2.6-8.2)                     |
| <b>2007-2008</b> | 49.5 (44.2-53.9)               | 18.0 (13.0-23.3)         | 11.8 (8.2-17.9)                         | 4.2 (2.8-7.2)                     |
| <b>2008-2009</b> | 51.1 (46.2-55.2)               | 19.0 (14.3-23.7)         | 11.7 (8.4-16.9)                         | 4.4 (2.9-6.6)                     |
| <b>2009-2010</b> | 52.8 (48.2-56.6)               | 20.0 (15.4-25.4)         | 12.2 (9.0-17.0)                         | 4.7 (2.9-6.8)                     |
| <b>2010-2011</b> | 52.7 (48.3-56.7)               | 20.7 (16.4-25.3)         | 12.1 (8.6-16.3)                         | 4.7 (2.9-7.0)                     |
| <b>2011-2012</b> | 53.8 (49.4-57.5)               | 21.8 (17.3-26.2)         | 12.2 (8.7-16.1)                         | 4.7 (3.0-7.0)                     |
| <b>2012-2013</b> | 54.5 (50.4-58.4)               | 22.3 (18.1-27.4)         | 12.4 (9.1-16.4)                         | 4.6 (3.0-7.4)                     |
| <b>2013-2014</b> | 55.6 (51.2-59.7)               | 23.8 (19.4-28.6)         | 12.5 (8.9-16.4)                         | 4.6 (2.9-7.4)                     |
| <b>2014-2015</b> | 56.0 (51.8-60.1)               | 24.1 (19.8-29.2)         | 12.3 (8.8-16.3)                         | 4.6 (2.9-7.3)                     |
| <b>2015-2016</b> | 56.2 (52.1-60.5)               | 23.0 (18.7-28.0)         | 11.7 (8.3-15.5)                         | 4.5 (2.4-7.2)                     |
| <b>2016-2017</b> | 56.4 (52.1-60.4)               | 24.0 (18.9-29.2)         | 11.8 (8.2-16.1)                         | 4.5 (2.5-7.7)                     |
| <b>2017-2018</b> | 56.9 (52.9-60.9)               | 24.0 (19.6-28.9)         | 11.4 (7.4-15.8)                         | 4.2 (2.2-7.3)                     |
| <b>2018-2019</b> | 58.4 (54.1-61.8)               | 24.7 (19.9-29.2)         | 11.3 (7.3-15.4)                         | 4.3 (2.1-7.1)                     |

**Table 10 Medians (25<sup>th</sup> – 75<sup>th</sup> centiles) of proportion of high volume (12 or more consultations) by consultation type, all practices**

| Year      | All consultations by all staff |                          | Face-to-face consultations |                  |
|-----------|--------------------------------|--------------------------|----------------------------|------------------|
|           | All consultations by all staff | All consultations by GPs | by all staff               | by GPs           |
| 2000-2001 | 73.9 (68.3-78.5)               | 43.1 (30.6-56.4)         | 35.8 (28.1-47.0)           | 20.7 (15.7-34.1) |
| 2001-2002 | 77.6 (71.5-81.3)               | 43.2 (31.7-53.7)         | 36.8 (28.6-48.1)           | 20.2 (15.1-31.7) |
| 2002-2003 | 79.8 (74.1-83.8)               | 43.6 (31.1-54.8)         | 36.1 (28.3-49.3)           | 19.4 (14.0-29.8) |
| 2003-2004 | 82.3 (76.5-85.9)               | 48.3 (37.5-57.2)         | 37.3 (28.4-52.7)           | 19.4 (13.8-31.0) |
| 2004-2005 | 83.8 (78.2-87.0)               | 51.7 (42.4-60.2)         | 39.3 (29.7-55.8)           | 19.7 (13.6-33.3) |
| 2005-2006 | 85.6 (80.5-88.8)               | 54.1 (45.7-62.5)         | 40.4 (30.7-57.0)           | 20.1 (14.4-33.4) |
| 2006-2007 | 86.1 (81.5-89.1)               | 55.9 (46.9-64.2)         | 41.1 (31.8-56.0)           | 20.4 (14.8-33.2) |
| 2007-2008 | 87.2 (83.3-89.8)               | 55.7 (46.2-64.0)         | 40.2 (31.4-52.6)           | 20.4 (14.8-30.6) |
| 2008-2009 | 88.3 (84.9-90.6)               | 57.5 (48.5-64.5)         | 40.1 (32.0-51.0)           | 21.2 (15.1-28.9) |
| 2009-2010 | 88.9 (86.2-91.1)               | 59.3 (50.6-66.6)         | 41.0 (33.2-51.0)           | 22.0 (15.5-29.5) |
| 2010-2011 | 89.1 (86.4-91.3)               | 59.9 (52.3-66.7)         | 41.0 (32.7-50.1)           | 21.9 (15.7-30.1) |
| 2011-2012 | 89.8 (87.3-91.7)               | 61.6 (54.1-68.4)         | 41.7 (33.0-49.5)           | 21.9 (16.0-30.0) |
| 2012-2013 | 90.2 (87.8-92.1)               | 62.8 (56.1-70.3)         | 42.4 (33.4-50.0)           | 22.3 (16.1-31.3) |
| 2013-2014 | 90.7 (88.3-92.6)               | 65.1 (58.4-71.4)         | 42.5 (33.8-50.5)           | 22.1 (15.8-32.1) |
| 2014-2015 | 90.9 (88.7-92.8)               | 66.2 (59.6-72.0)         | 43.2 (34.0-50.5)           | 22.9 (16.1-32.4) |
| 2015-2016 | 90.6 (88.3-92.5)               | 65.7 (58.4-71.6)         | 43.0 (33.7-50.8)           | 23.1 (15.2-32.4) |
| 2016-2017 | 91.2 (88.9-93.0)               | 66.1 (58.7-72.7)         | 42.9 (33.5-51.5)           | 22.7 (14.5-34.0) |
| 2017-2018 | 91.3 (89.3-93.2)               | 65.8 (59.2-72.2)         | 41.7 (32.0-51.5)           | 22.9 (14.0-32.5) |
| 2018-2019 | 92.0 (90.2-93.6)               | 67.0 (59.9-73.0)         | 41.6 (31.5-50.5)           | 22.2 (13.4-32.0) |
